# Supplementary material for: Classification of Brainstem Gliomas Based on Tumor Microenvironment Status
Source: MDPI journal article supplement (doi:10.3390/cancers15174224), 2023-08-23
Supplement: s1 [file s1]

**Table S1.** Antibodies or DAPI and the conditions used for multidimensional fluorescence staining

| Stain Order | Target       | Antibody Clone (host species) or lot# /Company | Dilution | Opal dye (Dilution) | CITY/Nation   |
|-------------|--------------|------------------------------------------------|----------|---------------------|---------------|
| 1           | Collagen III | ab23445 (Mouse)/Abcam                          | 1/200    | 520 (1:100)         | Cambridge/UK  |
| 2           | CA9          | ab107257 (Mouse)/Abcam                         | 1/400    | 570 (1:100)         | Cambridge/UK  |
| 3           | MMP1         | ab52631 (Rabbit)/Abcam                         | 1/200    | 620 (1:100)         | Cambridge/UK  |
| 4           | CD3E         | ab52959 (Rabbit)/Abcam                         | 1/400    | 690 (1:100)         | Cambridge/UK  |
| 7           | DAPI         | C0060/Solarbio                                 | 1/500    |                     | Beijing/China |

**Table S2.** Procedures for multidimensional fluorescence staining

| Antigen                             | Collagen<br>III | CA9        | MMP1       | CD3E       | DAPI     |
|-------------------------------------|-----------------|------------|------------|------------|----------|
| Antigen retrieval                   | AR6             | AR6        | AR9        | AR6        |          |
|                                     | 20 min          | 20 min     | 20 min     | 20 min     |          |
| Wash                                | TBST            | TBST       | TBST       | TBST       |          |
|                                     | 10 min          | 10 min     | 10 min     | 10 min     |          |
| Blocking                            | 10 min          | 10 min     | 10 min     | 10 min     |          |
|                                     | @RT             | @RT        | @RT        | @RT        |          |
| Inc. with Primary<br>antibody       | Over night      | Over night | Over night | Over night | 10 min   |
|                                     | @4°C            | @4°C       | @4°C       | @4°C       | @RT      |
| Wash                                | TBST            | TBST       | TBST       | TBST       | TBST     |
|                                     | 10 min          | 10 min     | 10 min     | 10 min     | 10 min   |
| Inc. with Opal HRP<br>Polymer Ms+Rb | 10 min          | 10 min     | 10 min     | 10 min     |          |
|                                     | @RT             | @RT        | @RT        | @RT        |          |
| Wash                                | TBST            | TBST       | TBST       | TBST       | Mounting |
|                                     | 10 min          | 10 min     | 10 min     | 10 min     |          |

@RT: At room temperature; @4°C: At 4°C

**Table S3.** Results of univariate Cox regression

|                        | HR        | P value          |
|------------------------|-----------|------------------|
| <b>Age</b>             | 0.996     | 0.563            |
| <b>Gender</b>          |           |                  |
| Female                 | Reference |                  |
| Male                   | 0.972     | 0.811            |
| <b>Tumor Location</b>  |           | <b>0.001</b>     |
| Pons                   | Reference |                  |
| Midbrain               | 0.381     | <b>0.001</b>     |
| Medulla                | 0.401     | <b>0.012</b>     |
| <b>DIPG</b>            |           |                  |
| N                      | Reference |                  |
| Y                      | 2.882     | <b>&lt;0.001</b> |
| <b>WHO Grade</b>       |           |                  |
| 4                      | Reference |                  |
| 3                      | 0.344     | <b>0.006</b>     |
| 2                      | 0.076     | <b>&lt;0.001</b> |
| 1                      | <0.001    | 0.971            |
| <b>Driver Mutation</b> |           | <b>&lt;0.001</b> |
| Wildtype               | Reference |                  |
| H3F3A                  | 10.733    | <b>&lt;0.001</b> |
| HIST1H3B               | 120.301   | <b>&lt;0.001</b> |
| IDH1                   | 1.939     | 0.205            |
| <b>Radiotherapy</b>    |           |                  |
| Not received           | Reference |                  |
| Received               | 0.967     | 0.892            |
| <b>Chemotherapy</b>    |           |                  |
| Not received           | Reference |                  |
| Received               | 0.624     | 0.058            |
